# Supplementary material for: Protective function and durability of mouse lymph node-resident memory CD8+ T cells
Source: eLife. 2021 Jun 18;10:e68662. doi: 10.7554/eLife.68662 (PMC8213409; doi:10.7554/eLife.68662)
Supplement: Figure 1—source data 1. [file elife-68662-fig1-data1.xlsx]

## Sheet: Fig1_B
# CD69+ / CD103+ (of iv- NP366 Tet+)
mLN	cLN
1755	160
835	125
2113	127
265	224
2610	174
5766	119
1497	104
	104
