# Supplementary material for: Protective function and durability of mouse lymph node-resident memory CD8+ T cells
Source: eLife. 2021 Jun 18;10:e68662. doi: 10.7554/eLife.68662 (PMC8213409; doi:10.7554/eLife.68662)
Supplement: Figure 1—source data 2. [file elife-68662-fig1-data2.xlsx]

## Sheet: Fig1_D
% CD69+ / CD103+ (%total P14)
PR8-GP33 IN	Vac-GP33 IN
52	9
56	13
61	7
42	11
59	24
