# Supplementary material for: Protective function and durability of mouse lymph node-resident memory CD8+ T cells
Source: eLife. 2021 Jun 18;10:e68662. doi: 10.7554/eLife.68662 (PMC8213409; doi:10.7554/eLife.68662)
Supplement: Figure 2—source data 1. [file elife-68662-fig2-data1.xlsx]

## Sheet: Figure2_A
%P14 / CD8
1M	4M
2.93	1.67
0.94	1.47
1.7	1.42
1.99	1.3
1.05	1.69
