# Supplementary material for: Protective function and durability of mouse lymph node-resident memory CD8+ T cells
Source: eLife. 2021 Jun 18;10:e68662. doi: 10.7554/eLife.68662 (PMC8213409; doi:10.7554/eLife.68662)
Supplement: Figure 2—source data 3. [file elife-68662-fig2-data3.xlsx]

## Sheet: Figure2_C
# CD103+ CD69+ P14+ (mLN @ d100)
1M	4M
1028	37368
524	32500
581	27052
701	66553
