# Supplementary material for: Protective function and durability of mouse lymph node-resident memory CD8+ T cells
Source: eLife. 2021 Jun 18;10:e68662. doi: 10.7554/eLife.68662 (PMC8213409; doi:10.7554/eLife.68662)
Supplement: Figure 2—source data 4. [file elife-68662-fig2-data4.xlsx]

## Sheet: Figure2_D
LCMV (PFU/mL)	Naive mLN	1M mLN	4M mLN
	40000	21000	100
	190000	14000	13000
	130000	7000	100
	38000	2300	500
	28000	100000	3100
	48000	100	50
	46000	800	60
	52000	1600	40
		1700	90
		100
