# Supplementary material for: Protective function and durability of mouse lymph node-resident memory CD8+ T cells
Source: eLife. 2021 Jun 18;10:e68662. doi: 10.7554/eLife.68662 (PMC8213409; doi:10.7554/eLife.68662)
Supplement: Figure 2—source data 5. [file elife-68662-fig2-data5.xlsx]

## Sheet: Figure2_E
LCMV (PFU/mL)	Naive SP	1M SP	4M SP
	40000	35000	300
	170000	800	100
	60000	700	500
		1000	100
		16000
