# Supplementary material for: Protective function and durability of mouse lymph node-resident memory CD8+ T cells
Source: eLife. 2021 Jun 18;10:e68662. doi: 10.7554/eLife.68662 (PMC8213409; doi:10.7554/eLife.68662)
Supplement: Figure 2—source data 6. [file elife-68662-fig2-data6.xlsx]

## Sheet: Figure2_F
LCMV PFU/mL
Naïve-UNT	Naïve-FTY720	4m-UNT	4m-FTY720
4000	10000	30	80
1000	3300	50	30
7000	4900	50	10
1000	9000	30	50
2000	4100	10	110
