# Supplementary material for: Protective function and durability of mouse lymph node-resident memory CD8+ T cells
Source: eLife. 2021 Jun 18;10:e68662. doi: 10.7554/eLife.68662 (PMC8213409; doi:10.7554/eLife.68662)
Supplement: Figure 3—figure supplement 1—source data 1. [file elife-68662-fig3-figsupp1-data1.xlsx]

## Sheet: Sheet1
day	1M				4M
30	20076	39690	31800	24063	1980	1148	1400	1325
100	19342	25610	25600	35600	750	1909	624	984
150	25221	31318	49614	26133	1106	982	663	1004
250	31250	21700	42500	22732	512	313	905	813
