# Supplementary material for: Protective function and durability of mouse lymph node-resident memory CD8+ T cells
Source: eLife. 2021 Jun 18;10:e68662. doi: 10.7554/eLife.68662 (PMC8213409; doi:10.7554/eLife.68662)
Supplement: Figure 3—source data 1. [file elife-68662-fig3-data1.xlsx]

## Sheet: Figure 3_A
day	1M				4M
30	18316	13581	10416	14136	50652	46800	75600	52470
100	13410	10664	15750	11904	51757	43920	35088	87570
150	18079	19784	26335	19016	21008	52008	26242	34588
250	19980	9378	18480		23150	11600	20480
