# Supplementary material for: Protective function and durability of mouse lymph node-resident memory CD8+ T cells
Source: eLife. 2021 Jun 18;10:e68662. doi: 10.7554/eLife.68662 (PMC8213409; doi:10.7554/eLife.68662)
Supplement: Figure 3—source data 2. [file elife-68662-fig3-data2.xlsx]

## Sheet: Figure 3_C
day	1M				4M
30	5494	3259	2083	7541	36469	32292	44604	40401
100	1028	524	581	701	37368	32500	27052	66553
150	1260	0	460	0	10354	30054	13316	29817
250	126	0	0	0	15417	19227	16409	18412
