# Supplementary material for: Protective function and durability of mouse lymph node-resident memory CD8+ T cells
Source: eLife. 2021 Jun 18;10:e68662. doi: 10.7554/eLife.68662 (PMC8213409; doi:10.7554/eLife.68662)
Supplement: Figure 4—figure supplement 1—source data 1. [file elife-68662-fig4-figsupp1-data1.xlsx]

## Sheet: Sfigure_2_C
S2C 107+	1M 103+ mLN	4M 103+ mLN	1M 103- mLN	4M 103- mLN
	99.3827	92.2515	97.4122	85.6209
	98.893	94.955	95.7798	91.3265
	98.806	98.3607	97.6608	95.7746
	97.7346	94.8229	97.9882	87.4552
	97.5758	94.9749	95.5112	93.4615
S2C 107+ IFNg+	1M 103+ mLN	1M 103- mLN	4M 103+ mLN	4M 103- mLN
	95.3704	87.9852	61.8421	48.0392
	95.203	87.3394	54.5946	51.5306
	95.8209	88.3041	70.4918	56.338
	88.9968	88.8757	70.0272	46.595
	88.6869	82.0449	71.3568	70.3846
