# Supplementary material for: Protective function and durability of mouse lymph node-resident memory CD8+ T cells
Source: eLife. 2021 Jun 18;10:e68662. doi: 10.7554/eLife.68662 (PMC8213409; doi:10.7554/eLife.68662)
Supplement: Figure 4—figure supplement 2—source data 1. [file elife-68662-fig4-figsupp2-data1.xlsx]

## Sheet: SuppFigure3_A
Figure S3A %	1M iLN	4M iLN	1M mLN	4M mLN
	67.6	31.7	61.9	21.3
	76.1	49.5	72.6	28.8
	68.4	26.7	83.5	32.9
	79.8	38.4	77.8	22.9
Figure S3A#	1M iLN	4M iLN	1M mLN	4M mLN
	4352	337	7592	1181
	6085	455	7242	809
	6550	99	9979	617
	4121	111	6951	497
