# Supplementary material for: Protective function and durability of mouse lymph node-resident memory CD8+ T cells
Source: eLife. 2021 Jun 18;10:e68662. doi: 10.7554/eLife.68662 (PMC8213409; doi:10.7554/eLife.68662)
Supplement: Figure 4—figure supplement 2—source data 2. [file elife-68662-fig4-figsupp2-data2.xlsx]

## Sheet: Sheet1
Figure S3B CD122 GMFI
1M CD103+	1M CD103-	4M CD103+	4M CD103-
754	2875	530	899
732	2913	596	1033
615	3017	562	1121
693	3543	603	934
