# Supplementary material for: Protective function and durability of mouse lymph node-resident memory CD8+ T cells
Source: eLife. 2021 Jun 18;10:e68662. doi: 10.7554/eLife.68662 (PMC8213409; doi:10.7554/eLife.68662)
Supplement: Figure 4—figure supplement 2—source data 3. [file elife-68662-fig4-figsupp2-data3.xlsx]

## Sheet: Sheet1
Figure S3C EOMES GMFI
1M CD103+	1M CD103-	4M CD103+	4M CD103-
487	2225	585	1070
532	2791	655	1083
429	3021	494	1003
458	2187	612	1184
