# Supplementary material for: Protective function and durability of mouse lymph node-resident memory CD8+ T cells
Source: eLife. 2021 Jun 18;10:e68662. doi: 10.7554/eLife.68662 (PMC8213409; doi:10.7554/eLife.68662)
Supplement: Figure 4—figure supplement 2—source data 4. [file elife-68662-fig4-figsupp2-data4.xlsx]

## Sheet: Sheet1
Figure S3D CD49a (GMFI)
1M CD103+	1M CD103-	4M mLN CD103+	4M mLN CD103-
2231	530	2418	1837
2376	194	3712	2634
2141	431	3909	2546
1760	373	4094	2873
