# Supplementary material for: Protective function and durability of mouse lymph node-resident memory CD8+ T cells
Source: eLife. 2021 Jun 18;10:e68662. doi: 10.7554/eLife.68662 (PMC8213409; doi:10.7554/eLife.68662)
Supplement: Figure 4—figure supplement 2—source data 5. [file elife-68662-fig4-figsupp2-data5.xlsx]

## Sheet: Sheet1
Figure 3E CXCR6 (GMFI)
1M CD103+	1M CD103-	4M CD103+	4M CD103-
1375	1572	1456	1383
1898	1565	2200	1615
1830	1528	1904	1549
1669	1383	1995	1456
1552	1364	1956	1532
