# Supplementary material for: Protective function and durability of mouse lymph node-resident memory CD8+ T cells
Source: eLife. 2021 Jun 18;10:e68662. doi: 10.7554/eLife.68662 (PMC8213409; doi:10.7554/eLife.68662)
Supplement: Figure 4—figure supplement 2—source data 6. [file elife-68662-fig4-figsupp2-data6.xlsx]

## Sheet: Sheet1
Figure 3F CXCR3 (GMFI)
1M CD103+	1M CD103-	4M CD103+	4M CD103-
	1937	1602	1502
1795	1649	1253	1539
2074	1890	1521	1221
2348	1956	1125	1549
	1604
