# Supplementary material for: Protective function and durability of mouse lymph node-resident memory CD8+ T cells
Source: eLife. 2021 Jun 18;10:e68662. doi: 10.7554/eLife.68662 (PMC8213409; doi:10.7554/eLife.68662)
Supplement: Figure 4—source data 1. [file elife-68662-fig4-data1.xlsx]

## Sheet: Figure 4B
Figure 4B	Granzyme A+
	1M CD103+	1M CD103-	4M CD103+	4M CD103-
1	6.64	0	16.5	1.79
2	9.78	0	20.2	1.98
3	6.03	0	20.5	4.35
4	9.02	0	17.4	3.16
