# Supplementary material for: Protective function and durability of mouse lymph node-resident memory CD8+ T cells
Source: eLife. 2021 Jun 18;10:e68662. doi: 10.7554/eLife.68662 (PMC8213409; doi:10.7554/eLife.68662)
Supplement: Figure 4—source data 2. [file elife-68662-fig4-data2.xlsx]

## Sheet: Figure 4C
Figure 4C
	1M	4M
1	137	869
2	148	1152
3	107	1530
4	154	503
