# Supplementary material for: Protective function and durability of mouse lymph node-resident memory CD8+ T cells
Source: eLife. 2021 Jun 18;10:e68662. doi: 10.7554/eLife.68662 (PMC8213409; doi:10.7554/eLife.68662)
Supplement: Figure 6—source data 1. [file elife-68662-fig6-data1.xlsx]

## Sheet: Figure6_B
1M mouse
1M	4M
90	10
97	3
99	1
92	8
4M mouse
4M	1M
4	95
4	96
2	98
10	89
