# Supplementary material for: Protective function and durability of mouse lymph node-resident memory CD8+ T cells
Source: eLife. 2021 Jun 18;10:e68662. doi: 10.7554/eLife.68662 (PMC8213409; doi:10.7554/eLife.68662)
Supplement: Figure 6—source data 2. [file elife-68662-fig6-data2.xlsx]

## Sheet: Figure6_C
1M mouse	1M				4M
Q1	93	94	91	96	6	6	9	3
Q2	93	85	97	91	5	14	3	9
4M mouse	4M				1M
Q1	98	99.8	99	97.2	2	0.2	1	2.8
Q2	56	42	60	39	44	58	40	61
